# Supplementary material for: An Integrative Pharmacology-Based Approach for Evaluating the Potential Effects of Purslane Seed in Diabetes Mellitus Treatment Using UHPLC-LTQ-Orbitrap and TCMIP V2.0
Source: Front Pharmacol. 2021 Feb 2;11:593693. doi: 10.3389/fphar.2020.593693 (PMC7884824; doi:10.3389/fphar.2020.593693)
Supplement: Supplementary file 5 [file table5.xlsx]

## Sheet: Sheet1
Table S5 Direct interactions among hub nodes in the MCXZ putative target-DM-related gene network
node1	node2
INS	INSR
IRS1	INSR
ATM	TP53
IGF1	IGF1R
NCOA1	PPARG
INS	IGF1R
SOD2	SOD1
AKT1	HSP90AA1
INSR	IGF1
AKT1	INS
IL6	STAT3
CDKN2A	TP53
IRS1	IGF1R
FOXP3	CTLA4
INS	IRS1
ESR1	NCOA1
BRCA1	TP53
BRCA1	ATM
AKT1	STAT3
INSR	IGF1R
INS	IGF1
AKT1	TP53
ADIPOQ	PPARG
PPARA	NCOA1
LEP	STAT3
FOS	MAPK1
IRS1	IGF1
PIK3R1	IRS1
LEP	PPARG
AKT1	ESR1
HSP90AA1	TP53
AKT1	PIK3R1
GSTM3	GSTM2
ESR1	IGF1R
STAT3	MAPK1
HSP90AA1	AHR
SOD2	GPX1
AR	HSP90AA1
FOS	STAT3
NCOA1	AR
GPX1	GSR
BRCA1	ESR1
TP53	STAT3
GPX1	SOD1
GSTM4	GSTM2
GSTA2	GSTA1
TP53	MAPK1
HSP90AA1	PGR
KRAS	MAPK1
GSR	GSS
INS	AKT2
TNF	IL6
IL6	ALB
IL6	STAT1
GPX7	GSR
AKT1	AKT2
TNF	PPARG
ESR1	FOS
IL6	MAPK1
LEP	IRS1
IL6	FOS
AKT2	HSP90AA1
HSP90AA1	STAT3
MMP9	STAT3
AKT1	IRS1
TNF	FOS
AKT1	CAV1
PIK3R1	IGF1R
ALB	APOE
ESR1	HSP90AA1
HSP90AA1	MAPK1
PIK3R1	STAT3
CDKN2A	KRAS
SOD2	GPX7
CAV1	HSP90AA1
CAV1	IRS1
INS	CAV1
TNF	STAT3
INS	LEP
GPX7	SOD1
ADIPOQ	LEP
IRS1	MAPK1
ESR1	SMAD4
IGF1	ALB
PPARG	TP53
AKT1	SOD2
SLC2A4	PPARG
AKT2	TP53
STAT1	STAT3
STAT1	MAPK1
HPGDS	GSR
TNF	STAT1
CDKN2A	SMAD4
PIK3R1	INSR
ESR1	MAPK1
ESR1	IGF1
CYP1B1	COMT
INS	SLC2A4
FOS	TP53
IL6	APOE
GNAS	ADRB2
PIK3R1	AKT2
FOS	PPARG
ADIPOQ	INS
ESR1	STAT1
SMAD4	HNF4A
AKT1	CTLA4
ADRB2	CFTR
TNF	CAV1
ESR1	PGR
AKT1	SOD1
PIK3R1	ESR1
IGF1	MAPK1
INS	GCK
HTR1A	SLC6A4
AR	SMAD4
HSP90AA1	KRAS
GSTM1	GSTM2
AKT1	IGF1
PRKACA	LIPE
PGR	MAPK1
INS	ALB
PPARA	HSP90AA1
PIK3R1	INS
PIK3R1	AR
IRS1	KRAS
CAV1	INSR
NCOA1	PGR
GPX1	GSS
PIK3R1	KRAS
GSTM4	GSTM3
PPARA	MAPK1
GGT1	GSR
TNF	PPARA
IL6	FOXP3
ESR1	TP53
AKT1	INSR
IL6	INS
ADIPOQ	IL6
GGT1	GSS
PIK3R1	CDKN2A
INS	PPARG
PIK3R1	IGF1
TNF	MMP9
GPX7	GSS
IL6	LEP
CYP1B1	AHR
PRKCA	MAPK1
IGF1R	KRAS
PRKCA	HSP90AA1
SMAD4	FOS
NCOA1	HNF4A
AKT2	INSR
GNAS	PRKACA
GRIN2B	GRIN2A
SLC2A4	IRS1
IGF1R	MAPK1
AKT1	AR
DRD1	GNAS
FOXP3	FOS
ESR1	GNAS
AKT1	SLC2A4
GRIN2B	KRAS
HSP90AA1	PRKACA
TP53	KRAS
GRIN2A	KRAS
IL6	MMP9
PRKCA	GNAS
PRKCA	KRAS
PIK3R1	HSP90AA1
LEP	IGF1
DRD2	HTR1A
AKT1	SMAD4
GSTA4	GSTO1
AR	PGR
TNF	ADIPOQ
TNF	INS
SOD2	GSR
NCOA1	LEP
GGT1	GAD2
COMT	SLC6A4
NCOA1	ALB
ADIPOQ	NCOA1
AKT2	CTLA4
DRD1	ADRB2
PRKACA	IGF1R
NCOA1	FOS
HPGDS	GSS
NCOA1	SLC2A4
NCOA1	SMAD4
FOXP3	STAT3
GSTA2	FOS
SLC2A2	GCK
AR	PRKACA
AKT1	MAPK1
TP53	IGF1R
AR	TP53
TNF	LEP
PGR	PRKACA
GGT1	HPGDS
GSTO1	HPGDS
GSTP1	GSTO1
GPX7	GSTM3
GSTA4	GPX7
PRKACA	FOS
AKT2	MAPK1
PRKCA	FOS
AKT1	IL6
GSTO1	GSTM1
ESR1	AHR
AKT1	MMP9
GSTA2	GSTA4
IGF1R	STAT3
CYP1B1	GSTM1
CYP1B1	GSTP1
SOD1	GSR
GSTM4	GSR
TNF	FOXP3
GPX7	GSTM2
STAT1	FOS
GSTA4	GSTM3
GSTA4	GSTM1
GPX1	GSTM1
GSTA4	GSTM2
GPX1	HPGDS
MGST1	HPGDS
CYP3A4	HPGDS
AKT1	TNF
AKT1	ACTB
SOD2	TP53
PRKACA	CFTR
GSTO1	GSTA1
ESR1	PRKACA
GPX1	GSTM2
NQO1	TP53
GSTM2	GSR
PRKACA	MAPK1
GPX1	GSTP1
GPX1	GSTM3
IL6	TP53
GSTM4	GPX7
GSTO1	GSTM3
DRD2	COMT
GPX1	GSTA4
BRCA1	PGR
GSTA4	GSR
TH	DRD2
IL6	IGF1
GPX1	GSTM4
GSTO1	GSR
DRD1	TH
GSTM3	GSR
GSTO1	GSTM2
SLC2A4	LEP
ESR1	STAT3
INS	SLC2A2
TNF	ALB
CYP1B1	GSTA1
CYP1B1	HPGDS
AKT1	KRAS
ADIPOQ	IGF1
PIK3R1	PGR
INS	APOE
DRD2	SLC6A4
AKT2	SLC2A4
PRKCA	ACTB
SLC2A2	TP53
INS	ACE
AKT1	LEP
CYP3A4	GSTM1
GSTP1	CYP3A4
GPX7	GSTM1
ALB	ACE
GSTA4	GSTM4
GSTA2	GSTO1
GSTA4	GSTA1
INS	STAT3
TNF	MAPK1
CYP1B1	GSTM3
AR	STAT3
ESR1	CAV1
GSTP1	GSS
LEP	FOS
CYP3A4	GSTA1
GNAS	IGF1R
GRIN2B	PRKACA
INS	GAD2
SMAD4	KRAS
TNF	TP53
AR	IGF1
GSTM1	GSR
GSTA4	GSS
MGST1	GSTA1
TH	FOS
GSTP1	GSR
GPX1	GSTA1
BRCA1	CDKN2A
IGF1	TP53
GPX7	HPGDS
ADIPOQ	SLC2A4
AKT1	ADIPOQ
AKT1	FOS
GRIN2A	PRKACA
AKT1	ATM
INS	FOS
IL6	PPARG
GRIN2B	DRD2
GSTP1	MGST1
MGST1	GSTM1
GGT1	GSTP1
GSTA1	GSR
CYP1B1	GSTA2
MGST1	GSTM3
ESR1	IRS1
GGT1	ALB
GSTA1	GSS
TNF	CTLA4
NQO1	HPGDS
IL6	IRS1
INS	ACTB
MGST1	GSTA4
LEP	ALB
IGF1	STAT3
PPARA	PRKACA
GSTA2	MGST1
MMP9	TP53
MMP9	MAPK1
GSTM2	GSS
GSTA2	CYP3A4
FOS	IGF1
MGST1	GSTM2
MGST1	GSR
SMAD4	TP53
GSTA2	GSR
AKT1	STAT1
DRD1	FOS
PGR	TP53
TNF	APOE
INS	MMP9
AR	CAV1
IL6	CTLA4
MMP9	APOE
GSTM1	GSS
CYP3A4	AHR
STAT1	AHR
IL6	AR
GPX1	MGST1
AKT2	IRS1
SOD2	TNF
GSTM4	GSTO1
AR	IGF1R
GPX1	GSTO1
MGST1	GSTM4
AR	MAPK1
ACTB	PPARG
SMAD4	MAPK1
LEP	TP53
GSTA2	GPX1
GSTP1	GPX7
ESR1	AKT2
IL6	AHR
PPARG	APOE
STAT1	TP53
AKT1	BRCA1
LEP	APOE
GSTA2	GPX7
MGST1	GSTO1
GSTO1	GSS
PRKCA	GRIN2A
AKT1	ALB
GGT1	GSTM1
CYP1B1	GSTM2
ESR1	INS
ESR1	IL6
ESR1	LEP
GPX7	GSTA1
AKT1	FOXP3
INS	LIPE
IL6	SLC2A4
GSTO1	GPX7
SLC2A4	IGF1
BRCA1	AR
AKT1	CDKN2A
CYP1B1	GSTA4
SOD2	IL6
CYP3A4	GSTM2
GSTA1	GSTM1
FOXP3	AHR
CYP1B1	GSTM4
CDKN2A	IL6
GSTM3	GSS
GSTP1	HPGDS
ACTB	CAV1
STAT3	AHR
STAT1	PPARG
FOXP3	STAT1
GPX1	GGT1
CAV1	TP53
INS	MAPK1
GSTA4	CYP3A4
DRD1	SLC6A4
SOD2	ALB
CYP1B1	MGST1
GSTM4	CYP3A4
TH	COMT
NQO1	GSTM1
GSTM1	HPGDS
CYP3A4	GSTM3
GSTM1	GSTM3
GSTP1	TP53
TH	SLC6A4
CDKN2A	STAT3
MMP9	ALB
HNF4A	TP53
GSTM4	GSTM1
ADIPOQ	LIPE
AR	AHR
GSTM4	GSS
PPARA	INS
GSTA2	GSS
DRD1	COMT
CYP1B1	GSTO1
GRIN2B	DRD1
GSTA1	GSTM2
GSTA2	GSTM4
PGR	IGF1
GSTA4	HPGDS
HPGDS	GSTM2
GSTA1	HPGDS
GSTA1	GSTM3
HSP90AA1	CFTR
INS	TP53
GSTA2	GSTM1
GGT1	GPX7
GNAS	KRAS
HSP90AA1	SOD1
GSTP1	GSTA1
CDKN2A	ATM
TNF	SLC2A4
GSTA2	GSTM2
SLC2A2	LEP
GSTP1	NQO1
GSTM4	GSTA1
GSTA2	GSTM3
TH	ALB
GSTA2	HPGDS
HPGDS	GSTM3
ADIPOQ	IRS1
GSTP1	GSTM1
PPARG	LIPE
TNF	IGF1
AR	MMP9
GSTP1	GSTA4
ACE	APOE
NQO1	GSR
GGT1	GSTM4
CAV1	PPARG
MGST1	GSS
MMP9	SMAD4
INS	CYP3A4
INS	STAT1
GRIN2A	DRD1
MGST1	CYP3A4
ALB	STAT3
LEP	LIPE
MMP9	PPARG
GSTA2	GSTP1
IL6	HSP90AA1
ACTB	ALB
GGT1	GSTM2
MMP9	LEP
ACTB	TP53
ALB	HPGDS
CYP1B1	NQO1
GSTP1	GSTM4
IL6	KRAS
STAT3	KRAS
GSTM4	HPGDS
GSTP1	GSTM2
GRIN2B	AKT1
SOD2	NQO1
HNF4A	MAPK1
TNF	ACTB
ESR1	ALB
GRIN2B	PRKCA
MGST1	GPX7
FOXP3	PPARG
SOD2	HPGDS
GSTP1	GSTM3
IL6	ACE
AKT1	PPARG
TNF	AHR
GSTA2	GGT1
SLC2A4	GCK
GRIN2A	FOS
GSTA1	NQO1
ALB	TP53
SLC2A4	LIPE
ALB	MAPK1
BRCA1	SMAD4
GGT1	GSTA1
FOXP3	ALB
GGT1	GSTM3
TH	GAD2
CAV1	STAT3
GSTO1	CYP3A4
PGR	STAT3
SLC2A4	INSR
AKT1	PGR
NQO1	AHR
CAV1	LEP
AKT2	IGF1
GGT1	GSTA4
CYP3A4	ALB
PPARG	AHR
ATM	KRAS
CDKN2A	GSTP1
GGT1	GSTO1
GPX1	NQO1
ADIPOQ	ALB
CYP1B1	ESR1
ADIPOQ	PPARA
BRCA1	KRAS
ALB	GSR
GGT1	MGST1
NQO1	SOD1
PPARG	MAPK1
CDKN2A	AR
GSTM4	NQO1
AKT2	KRAS
GGT1	INS
HSP90AA1	IGF1R
INS	HNF4A
DRD2	FOS
INS	AR
CTLA4	STAT3
IRS1	PPARG
HPGDS	TP53
CDKN2A	ESR1
INS	ADRB2
IL6	ACTB
SOD2	GSS
CAV1	IGF1
ALB	GSTM3
SOD2	ATM
CAV1	MAPK1
ATM	IGF1R
TNF	ACE
CAV1	IGF1R
GSTP1	AR
AKT1	SLC2A2
HNF4A	GCK
AKT1	HNF4A
MMP9	FOS
AKT2	MMP9
AR	FOS
COMT	ACE
FOS	ACE
ADRB2	ACE
SOD2	INS
TNF	IRS1
ACTB	HSP90AA1
FOS	ALB
STAT1	HSP90AA1
TH	MAPK1
TNF	AR
GRIN2A	DRD2
ESR1	KRAS
ADIPOQ	ACE
HTR1A	FOS
CYP1B1	IL6
PRKCA	CAV1
ADIPOQ	APOE
COMT	APOE
CYP1B1	SOD2
CDKN2A	IGF1R
STAT1	CTLA4
COMT	HTR1A
PPARA	LEP
PRKCA	TP53
AR	SOD1
FOS	KRAS
HNF4A	ALB
AR	ALB
AR	ACTB
GPX7	ALB
MMP9	IGF1
SOD2	GSTM1
NQO1	FOS
SOD2	GSTP1
NQO1	GSTM2
LEP	GCK
IL6	GGT1
ESR1	ACTB
AKT1	DRD2
BRCA1	STAT3
BRCA1	HSP90AA1
ALB	SOD1
PRKCA	IRS1
BRCA1	STAT1
SLC2A2	IRS1
SLC2A4	ALB
MMP9	ACE
CAV1	KRAS
NQO1	GSTM3
AKT1	HPGDS
PGR	LEP
PPARA	SLC2A4
CAV1	ALB
AR	IRS1
HPGDS	SOD1
ALB	GSTM2
NCOA1	STAT3
TNF	GGT1
LEP	ACE
INS	PGR
NCOA1	AHR
SLC2A2	HNF4A
MMP9	NQO1
GSTA2	NQO1
TH	PRKACA
ADIPOQ	MMP9
ESR1	SOD1
GGT1	KRAS
TH	HTR1A
GSTA4	NQO1
SOD2	STAT3
GNAS	SMAD4
CYP3A4	HNF4A
GPX7	NQO1
GRIN2B	GAD2
ESR1	COMT
IGF1	PPARG
AKT1	APOE
IRS1	GCK
GRIN2A	GAD2
INS	HPGDS
ALB	PPARG
GPX1	IGF1
HPGDS	AHR
INS	FOXP3
GGT1	ACTB
ESR1	AR
TH	ADRB2
CDKN2A	INS
INS	KRAS
GNAS	TP53
ACTB	MAPK1
ESR1	MMP9
IL6	GPX7
PIK3R1	BRCA1
IGF1	CFTR
STAT1	APOE
NCOA1	TP53
BRCA1	MAPK1
SMAD4	CAV1
BRCA1	GSTP1
PIK3R1	TP53
DRD2	LEP
IRS1	STAT3
PGR	IGF1R
SMAD4	ATM
CDKN2A	MAPK1
GSTP1	INS
IGF1	KRAS
MMP9	STAT1
SLC2A2	ALB
ACTB	STAT3
SMAD4	STAT3
CAV1	ACE
INS	GSR
INS	CTLA4
IRS1	HPGDS
ACTB	INSR
SOD2	MAPK1
GRIN2B	FOS
GRIN2B	HTR1A
ACE	PPARG
CDKN2A	GNAS
GSTP1	COMT
INS	TH
ESR1	GSTP1
ACTB	FOS
CDKN2A	ALB
CTLA4	IGF1R
STAT1	ALB
MMP9	AHR
HSP90AA1	ALB
COMT	FOS
IRS1	ALB
MMP9	KRAS
PRKCA	IL6
CTLA4	ALB
COMT	ADRB2
CAV1	AHR
AKT1	ACE
ALB	CFTR
GGT1	TP53
AKT1	NQO1
AKT1	GCK
MMP9	ACTB
ALB	KRAS
COMT	LEP
ESR1	TNF
AR	INSR
PPARA	LIPE
INS	HSP90AA1
GSTP1	STAT3
ATM	MAPK1
COMT	CYP3A4
HSP90AA1	ATM
SOD2	HSP90AA1
ESR1	CYP3A4
ACTB	IGF1
PRKCA	CFTR
SOD2	PPARG
TNF	SOD1
ALB	ATM
GSTM1	TP53
INS	ATM
INS	SOD1
HSP90AA1	HPGDS
GSTA4	TP53
ESR1	ATM
ALB	GCK
IGF1	ACE
IL6	SOD1
TP53	AHR
STAT1	LEP
IRS1	LIPE
ESR1	HPGDS
GSTM4	ALB
IGF1	APOE
BRCA1	AHR
PGR	KRAS
ACTB	CFTR
PRKCA	PPARG
SLC2A4	IGF1R
CDKN2A	ACTB
GPX1	IL6
IL6	NQO1
PPARG	STAT3
COMT	GSTM1
TNF	KRAS
CDKN2A	PGR
PIK3R1	CTLA4
GRIN2A	NQO1
AKT1	IGF1R
SOD1	TP53
GPX1	INS
IRS1	TP53
PIK3R1	TNF
ADIPOQ	STAT3
PRKCA	HPGDS
IL6	GSR
PGR	ALB
SOD1	MAPK1
GRIN2A	HTR1A
FOXP3	KRAS
IL6	HPGDS
ADRB2	SLC6A4
CTLA4	TP53
AKT2	SLC2A2
TNF	HSP90AA1
NQO1	ALB
CDKN2A	FOS
SOD2	ACTB
ACTB	KRAS
PPARA	APOE
AR	HPGDS
PPARG	GCK
IL6	PPARA
SMAD4	IGF1R
LEP	INSR
SOD1	APOE
AKT1	GGT1
PGR	FOS
PRKCA	INS
ACTB	SOD1
INS	DRD2
TNF	HPGDS
GRIN2B	MAPK1
HNF4A	STAT3
HPGDS	MAPK1
GSTP1	AHR
COMT	NQO1
GPX7	IGF1
CTLA4	MAPK1
INS	AHR
SLC2A2	PPARG
INS	CFTR
GPX1	ALB
IGF1	SOD1
GPX1	TP53
AKT1	TH
GSTP1	GRIN2A
TH	LEP
ADRB2	INSR
AKT2	SMAD4
IL6	CAV1
AR	KRAS
SLC2A2	INSR
ALB	IGF1R
HNF4A	FOS
BRCA1	INS
TNF	NQO1
INS	GPX7
CYP3A4	IGF1R
PPARA	AHR
GSTP1	SOD1
CYP1B1	HSP90AA1
ALB	AHR
CYP3A4	ACE
SMAD4	ALB
SOD2	GSTA1
AKT1	PPARA
ADRB2	IRS1
ACTB	ACE
PPARA	CYP3A4
DRD1	DRD2
ADIPOQ	GGT1
CDKN2A	HSP90AA1
INS	GSTM3
IL6	IGF1R
MMP9	CAV1
IL6	SMAD4
PIK3R1	ADIPOQ
SOD2	IGF1R
CYP1B1	TP53
CDKN2A	TNF
PRKCA	PPARA
ESR1	HNF4A
CYP1B1	LEP
CDKN2A	IGF1
INSR	MAPK1
AKT1	GNAS
SLC6A4	APOE
GSTP1	MAPK1
FOS	SLC6A4
SOD2	TH
AR	HNF4A
INS	SMAD4
LIPE	MAPK1
ADIPOQ	GCK
ESR1	GSTM3
ADIPOQ	INSR
IL6	ATM
AKT1	GPX7
AKT1	GRIN2A
CDKN2A	MMP9
GSTM1	ALB
PPARA	STAT1
BRCA1	IGF1R
TP53	GSR
AKT1	GPX1
IL6	LIPE
SOD2	APOE
CDKN2A	PPARG
AKT2	STAT3
HSP90AA1	NQO1
ATM	STAT3
LEP	ADRB2
CDKN2A	AKT2
GNAS	ATM
ADRB2	LIPE
HSP90AA1	GSR
NCOA1	MAPK1
CYP1B1	STAT1
GRIN2B	SLC6A4
GGT1	MMP9
ACTB	LEP
FOS	ADRB2
MMP9	PGR
MMP9	IGF1R
GAD2	ALB
COMT	HPGDS
FOS	HPGDS
BRCA1	ALB
ESR1	ADIPOQ
ACTB	IGF1R
GAD2	FOS
GRIN2B	COMT
CTLA4	AHR
PPARA	ALB
GSR	MAPK1
SOD1	GSS
ACE	KRAS
SOD1	GSTM2
CDKN2A	PPARA
STAT1	IGF1
LEP	IGF1R
ADIPOQ	SLC2A2
INSR	PPARG
AKT1	DRD1
CAV1	APOE
IL6	TH
GSTA1	AHR
FOXP3	TP53
GSTM4	SOD1
GAD2	DRD2
INS	DRD1
HSP90AA1	IGF1
STAT1	ACTB
SOD2	GSTM4
TNF	ADRB2
ALB	LIPE
TNF	GSR
SLC2A4	ACE
ESR1	TH
AKT1	LIPE
DRD1	GAD2
SMAD4	AHR
AR	CYP3A4
GGT1	MAPK1
AKT2	PPARG
IL6	ADRB2
SOD2	GSTA4
AKT1	ADRB2
ESR1	ACE
FOXP3	MMP9
GSTM1	AHR
CYP1B1	CYP3A4
SOD2	IGF1
CDKN2A	HPGDS
FOXP3	CAV1
ACTB	HPGDS
TH	ACTB
FOS	IGF1R
TH	SOD1
AKT1	GSR
GRIN2B	GSR
TNF	CFTR
AR	ATM
HNF4A	IGF1R
NQO1	GSS
TNF	ATM
PGR	AHR
GPX1	TNF
GAD2	HTR1A
SOD2	COMT
INS	NQO1
SOD2	GSTM2
CYP3A4	NQO1
AKT1	AHR
LEP	MAPK1
TNF	GPX7
PRKCA	INSR
GRIN2B	TH
CAV1	SLC2A4
GRIN2A	GSR
SLC2A4	TP53
ACTB	PGR
PPARA	GCK
GSTA4	SOD1
IGF1	GCK
ESR1	APOE
GSTO1	APOE
SMAD4	IGF1
GSTA1	SOD1
GAD2	FOXP3
NCOA1	CYP3A4
SOD2	AKT2
PPARG	SOD1
HNF4A	KRAS
BRCA1	IGF1
PIK3R1	FOS
IL6	PGR
TP53	APOE
BRCA1	NCOA1
SLC2A2	IGF1
GSTA1	ALB
AKT1	GSTM4
HNF4A	IGF1
AR	LEP
GGT1	ACE
GSTP1	ACTB
ALB	SLC6A4
SOD2	GGT1
INS	GSTM2
TNF	LIPE
TNF	SMAD4
APOE	LIPE
GPX1	APOE
GAD2	CFTR
CDKN2A	HNF4A
PPARA	SLC2A2
PPARA	IRS1
CYP1B1	PGR
SOD2	MMP9
SOD1	IGF1R
GGT1	LEP
TNF	SLC2A2
TNF	IGF1R
BRCA1	ACTB
GSTM1	SOD1
PIK3R1	SLC2A4
ACTB	GCK
ACTB	APOE
IL6	CFTR
TH	IGF1
ESR1	FOXP3
PRKCA	ATM
GRIN2B	ALB
BRCA1	HPGDS
IRS1	ACE
PRKACA	KRAS
CYP3A4	HTR1A
CDKN2A	STAT1
MMP9	SOD1
MMP9	HNF4A
CDKN2A	CTLA4
ACE	SLC6A4
DRD2	APOE
CYP3A4	TP53
IL6	CYP3A4
ADIPOQ	AKT2
CTLA4	KRAS
MGST1	NQO1
CYP3A4	PGR
ACTB	ATM
IL6	SLC6A4
GRIN2A	TH
STAT1	KRAS
GRIN2A	MAPK1
AKT2	ATM
FOXP3	ACTB
AKT2	IGF1R
IRS1	APOE
MMP9	CTLA4
SOD1	GSTM3
ADRB2	PPARG
ADRB2	ALB
SOD2	SLC2A4
SOD2	ACE
GRIN2A	ALB
SOD2	INSR
GSTA2	AHR
PGR	ATM
HPGDS	PPARG
IGF1	HPGDS
PRKCA	PRKACA
INS	GSTA4
MGST1	ALB
PIK3R1	MAPK1
INSR	GCK
STAT3	APOE
TNF	TH
DRD2	ALB
FOXP3	SMAD4
AKT1	MGST1
FOS	CTLA4
AKT1	GSTP1
MMP9	HSP90AA1
ADIPOQ	TP53
BRCA1	FOS
ACE	MAPK1
SOD2	ESR1
CDKN2A	IRS1
TP53	CFTR
GSTP1	ALB
SOD2	ADIPOQ
SOD2	GSTO1
GPX1	ACTB
SOD2	GSTM3
GPX1	PPARG
CAV1	PGR
SLC2A4	MAPK1
GSTA4	ALB
CDKN2A	CAV1
PPARA	IGF1
ACTB	CTLA4
CYP3A4	SLC2A2
SOD2	IRS1
NQO1	MAPK1
AKT2	LEP
BRCA1	CFTR
ESR1	NQO1
GRIN2B	APOE
IL6	HNF4A
